# Supplementary material for: Positional isomers of mannose–quinoline conjugates and their copper complexes: exploring the biological activity
Source: Royal Society of Chemistry journal article supplement (doi:10.1039/c8nj00993g), 2018-01-01
Supplement: c8nj00993g1.pdf [file c8nj00993g1.pdf]

## Supporting Information

Positional Isomers of Mannose-Quinoline Conjugates and their Copper Complexes: Exploring the Biological Activity

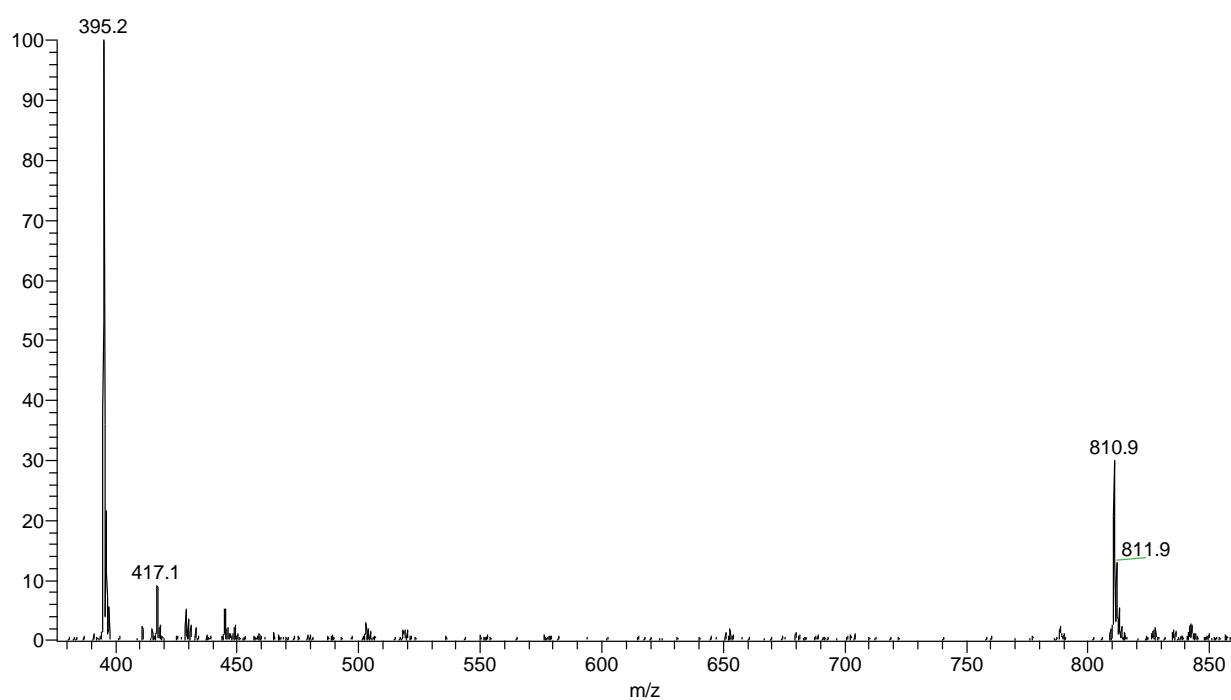

Figure S1. ESI-MS spectrum of ManHQ5 in water

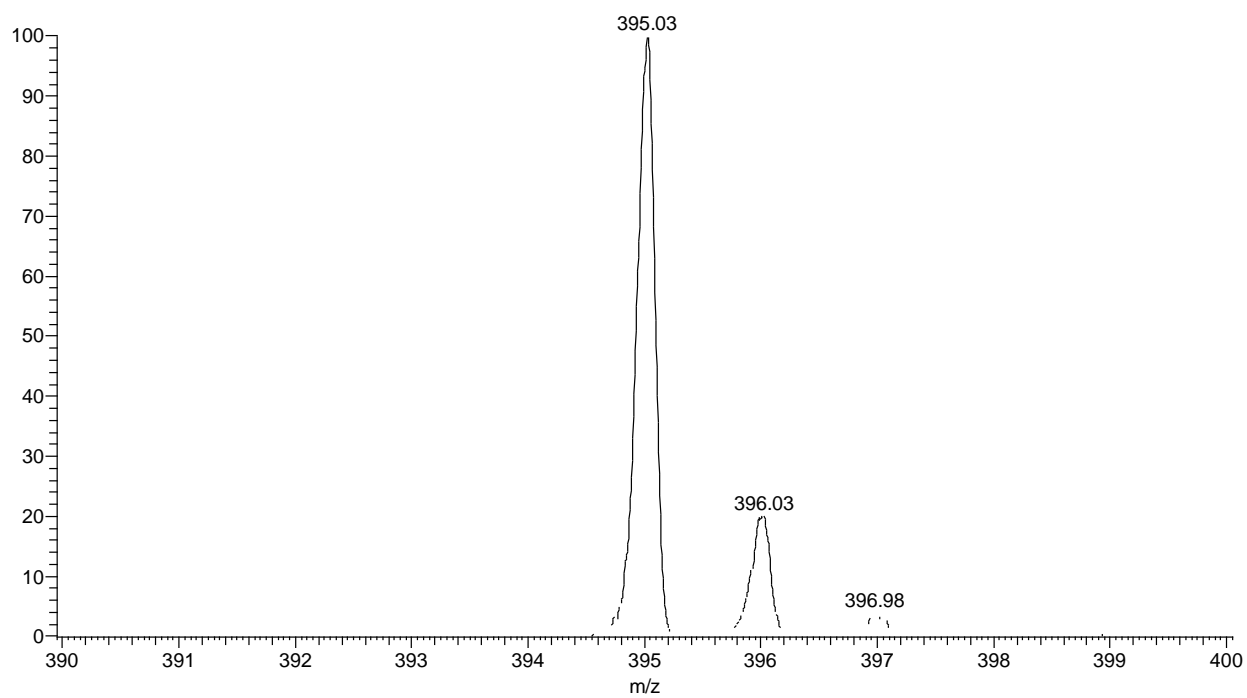

**Figure S2. ESI-MS (zoom-scan) spectrum of ManHQ2 in water**

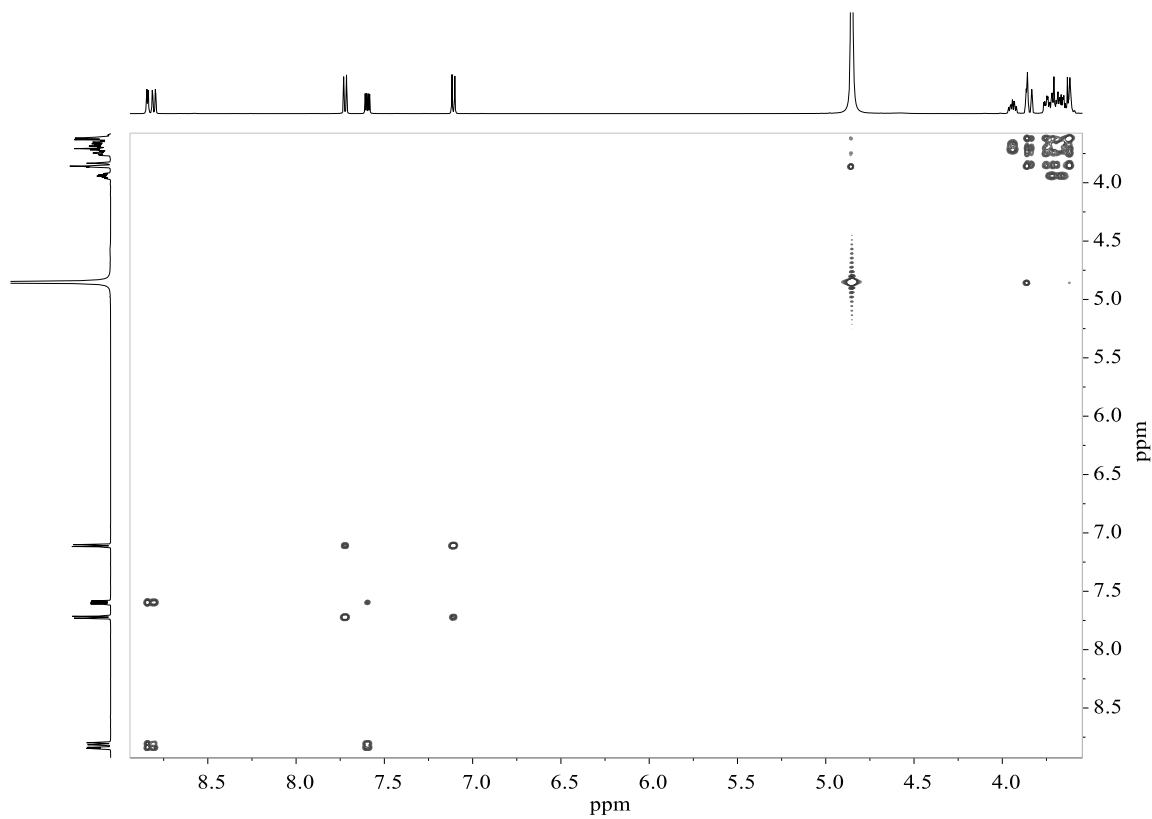

**Figure S3. TOCSY spectrum of ManHQ5 in CD<sub>3</sub>OD at 500 MHz.**

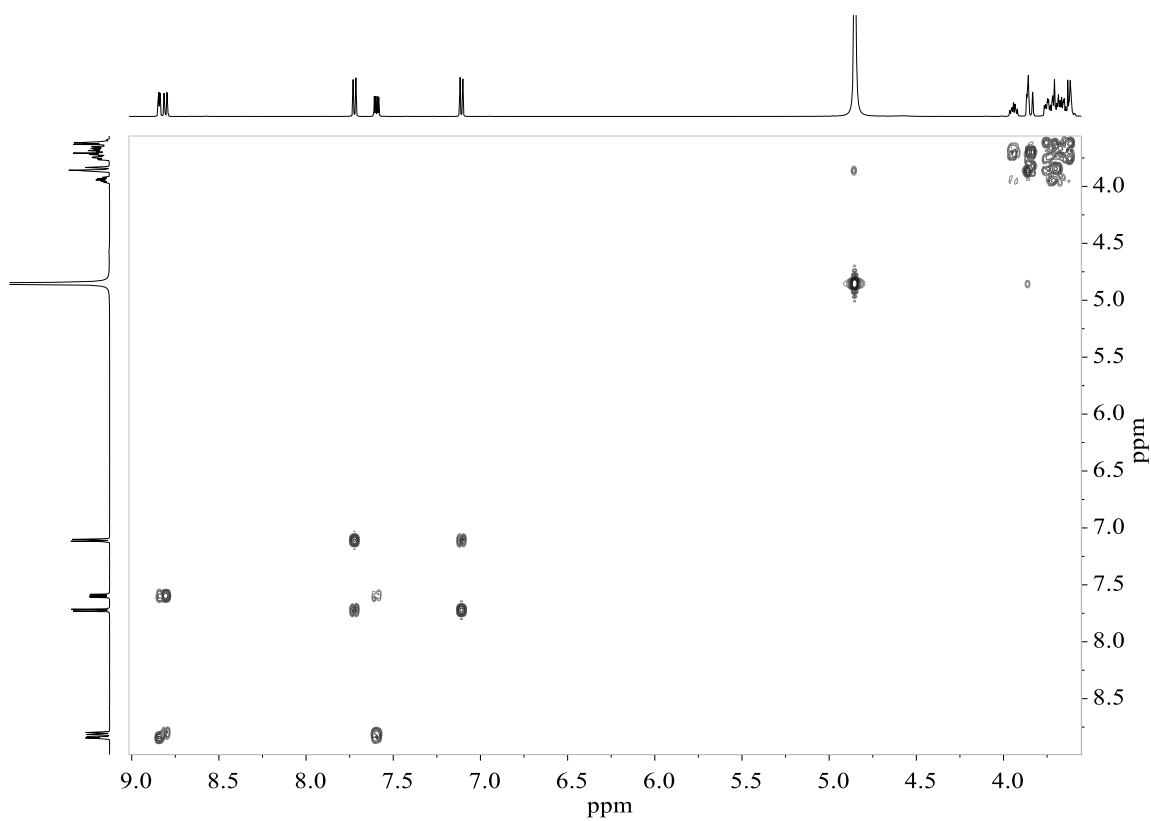

**Figure S4. COSY spectrum of ManHQ5 in CD<sub>3</sub>OD at 500 MHz.**

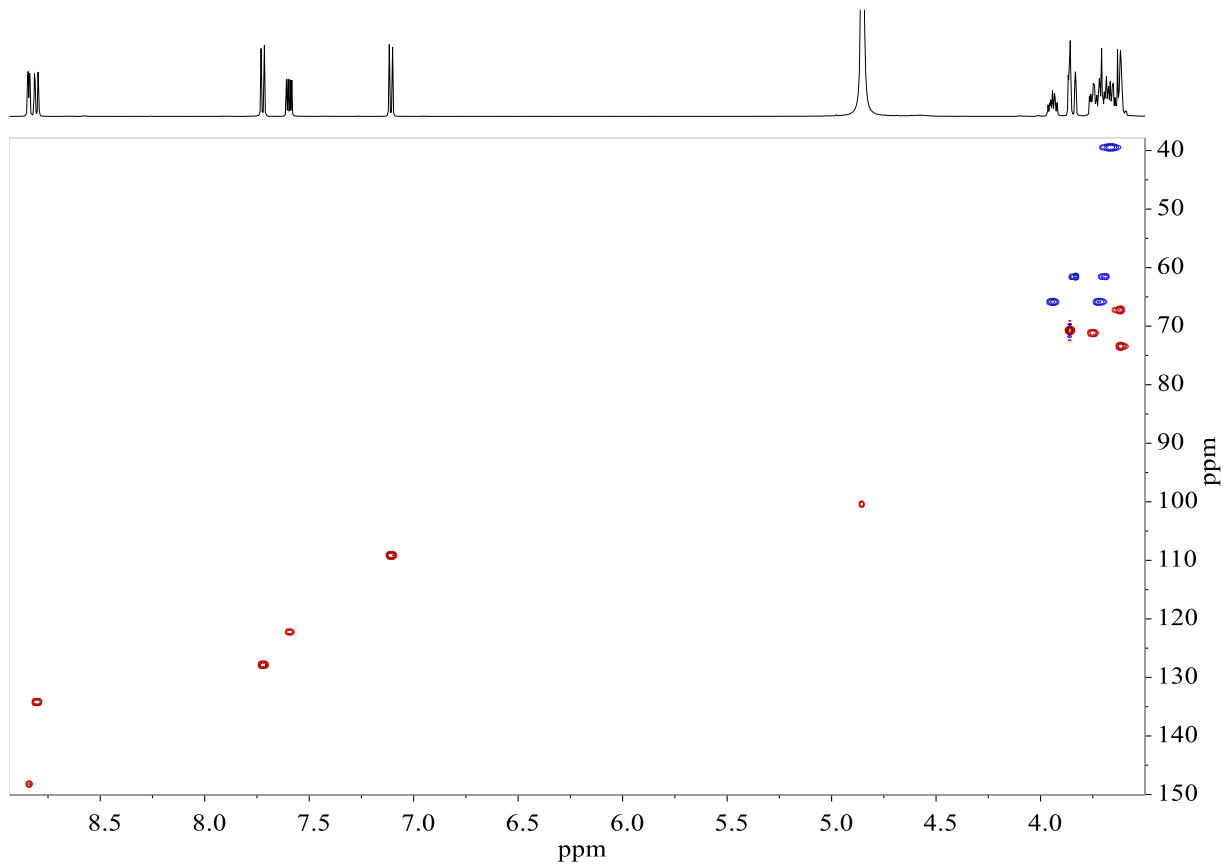

**Figure S5. HSQCAD spectrum of ManHQ5 in D<sub>2</sub>O at 500 MHz.**

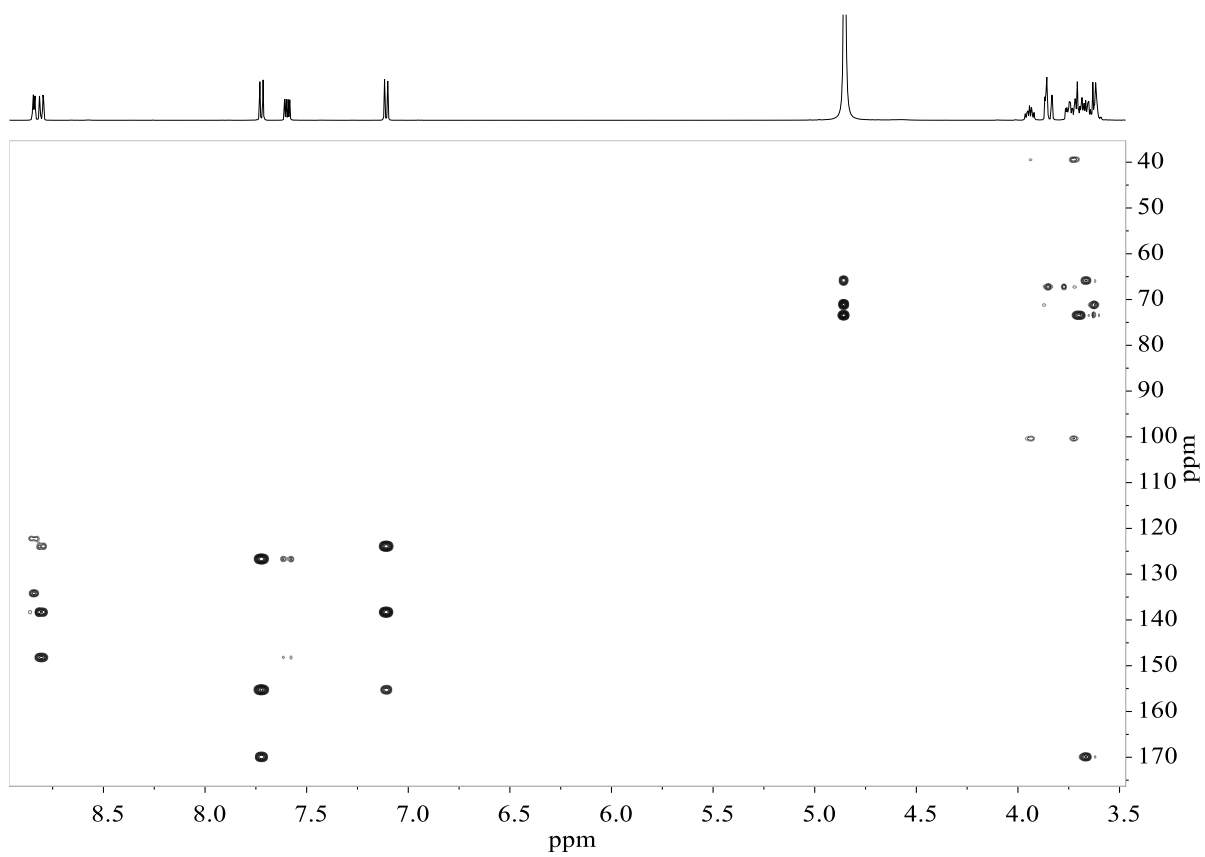

**Figure S6. HMBCAD spectrum of ManHQ5 in CD<sub>3</sub>OD at 500 MHz.**

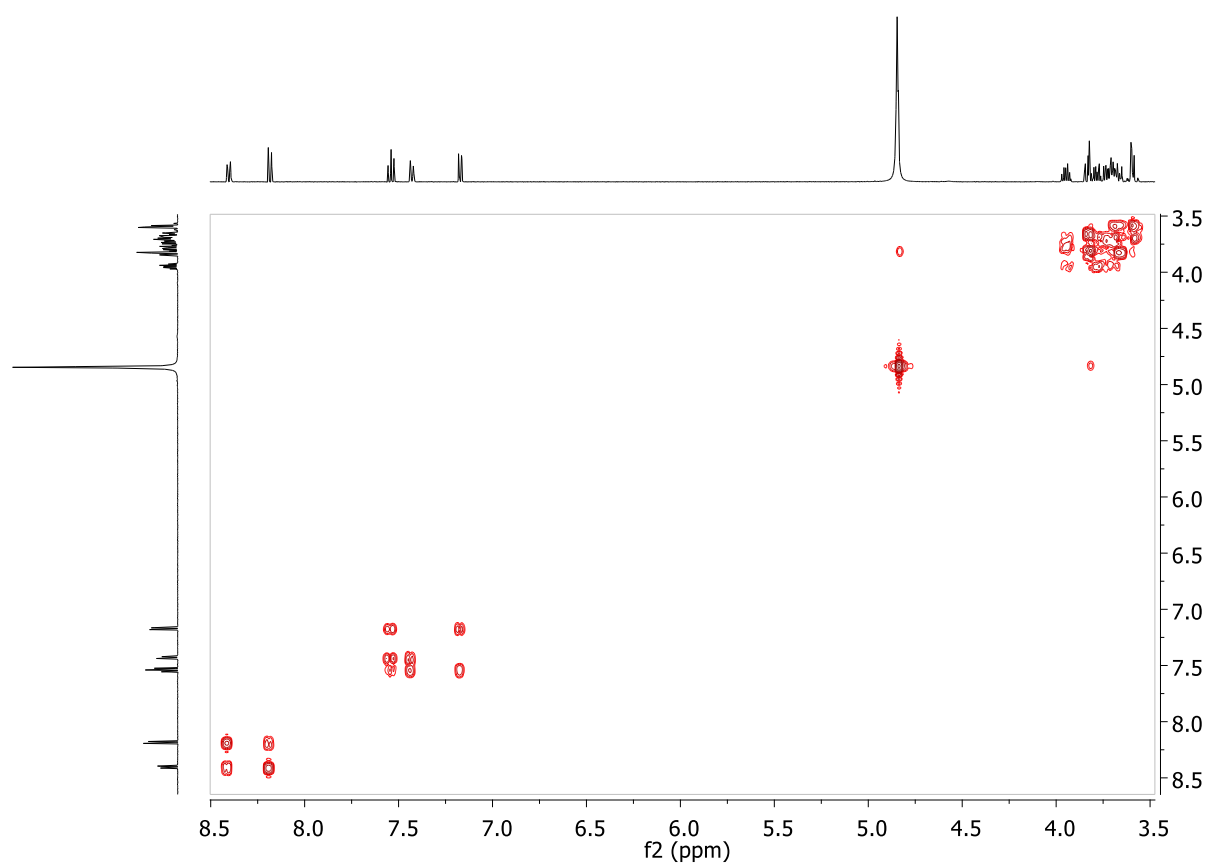

**Figure S7. COSY spectrum of ManHQ2 in CD<sub>3</sub>OD at 500 MHz.**

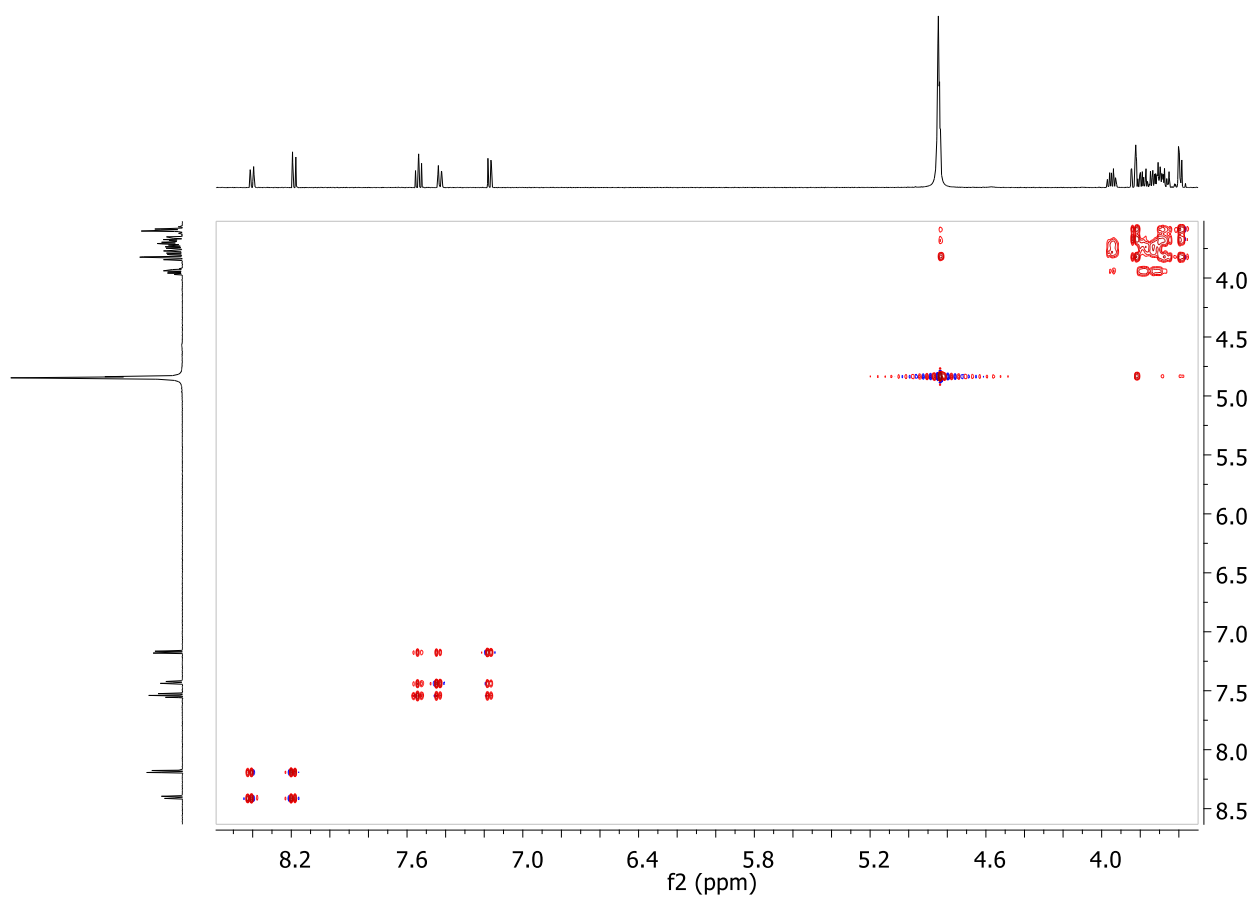

**Figure S8. TOCSY spectrum of ManHQ2 in CD<sub>3</sub>OD at 500 MHz.**

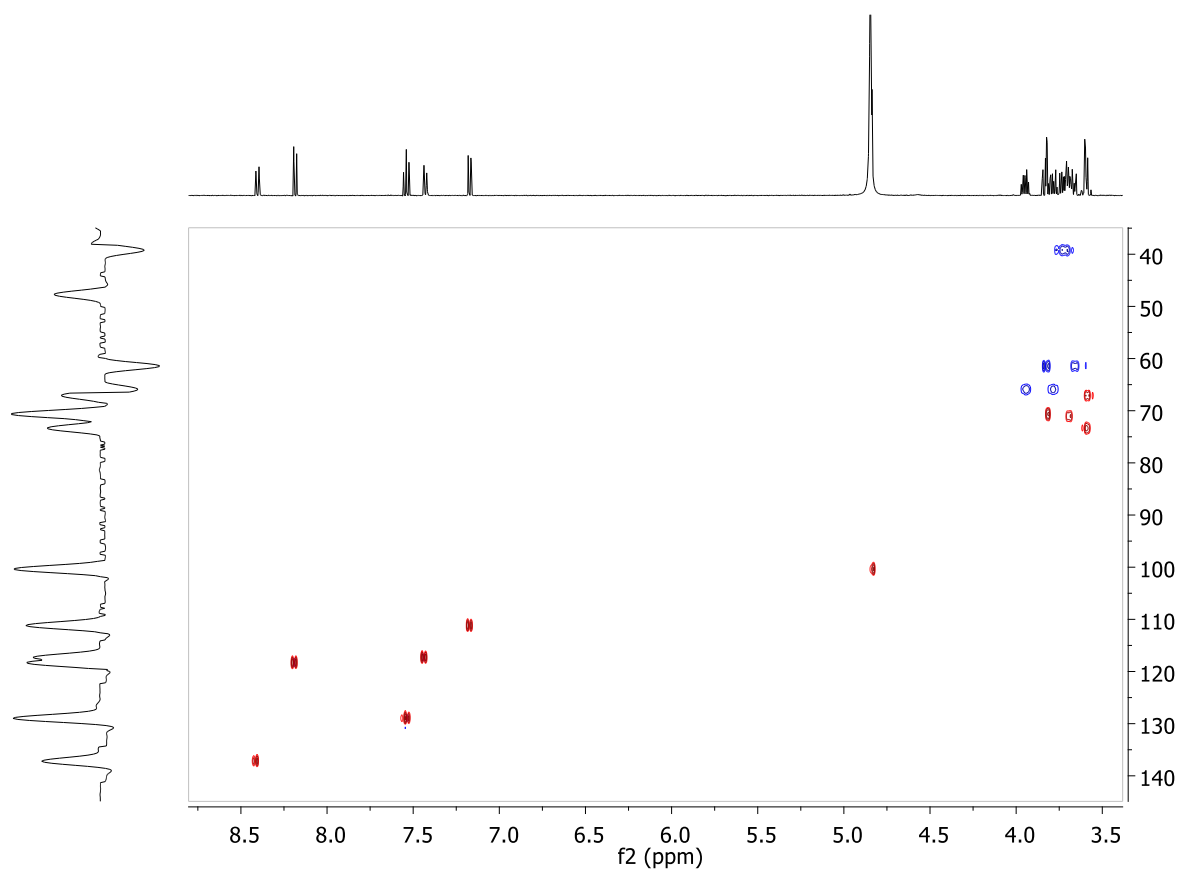

**Figure S9. HSQCAD spectrum of ManHQ2 in CD<sub>3</sub>OD at 500 MHz.**

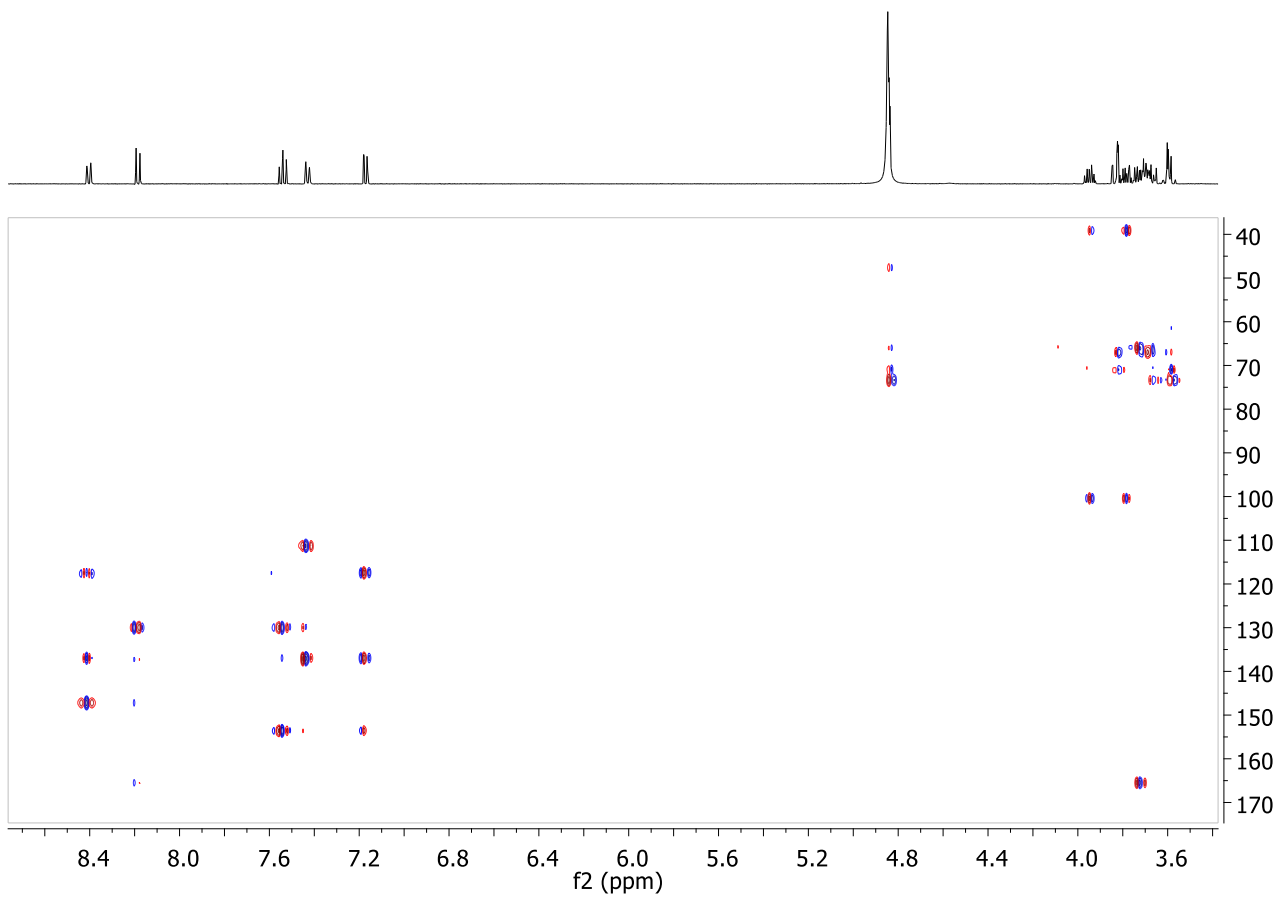

**Figure S10. HMBCAD spectrum of ManHQ2 in CD<sub>3</sub>OD at 500 MHz.**



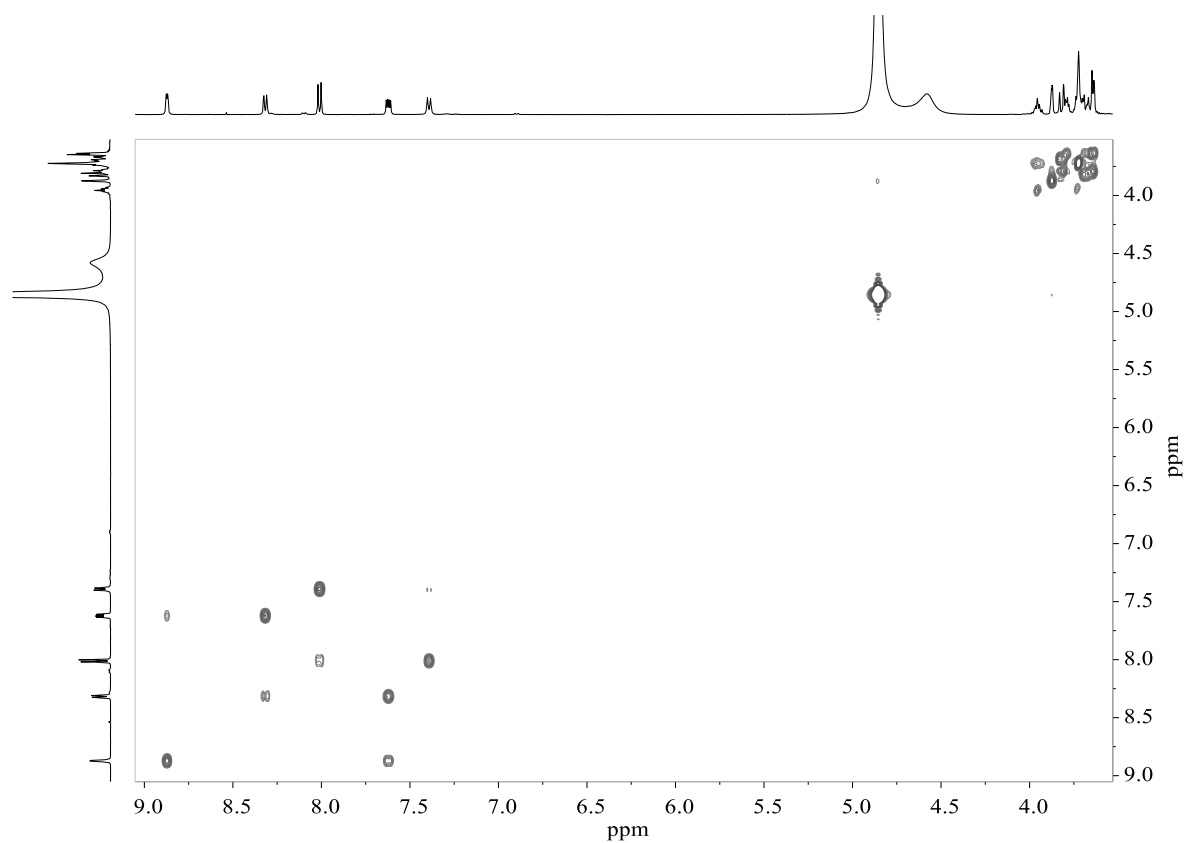

**Figure S11. COSY spectrum of ManHQ7 in CD<sub>3</sub>OD at 500 MHz.**

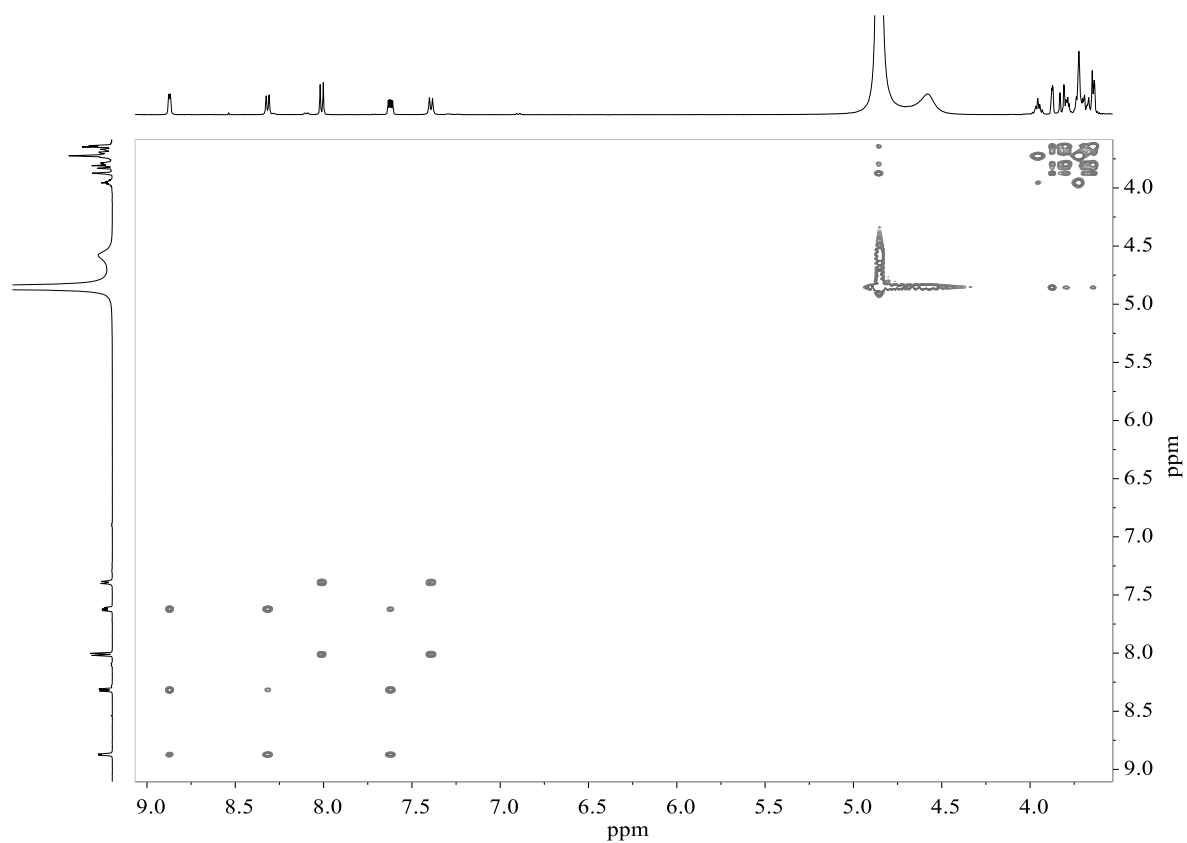

**Figure S12. TOCSY spectrum of ManHQ7 in CD<sub>3</sub>OD at 500 MHz.**

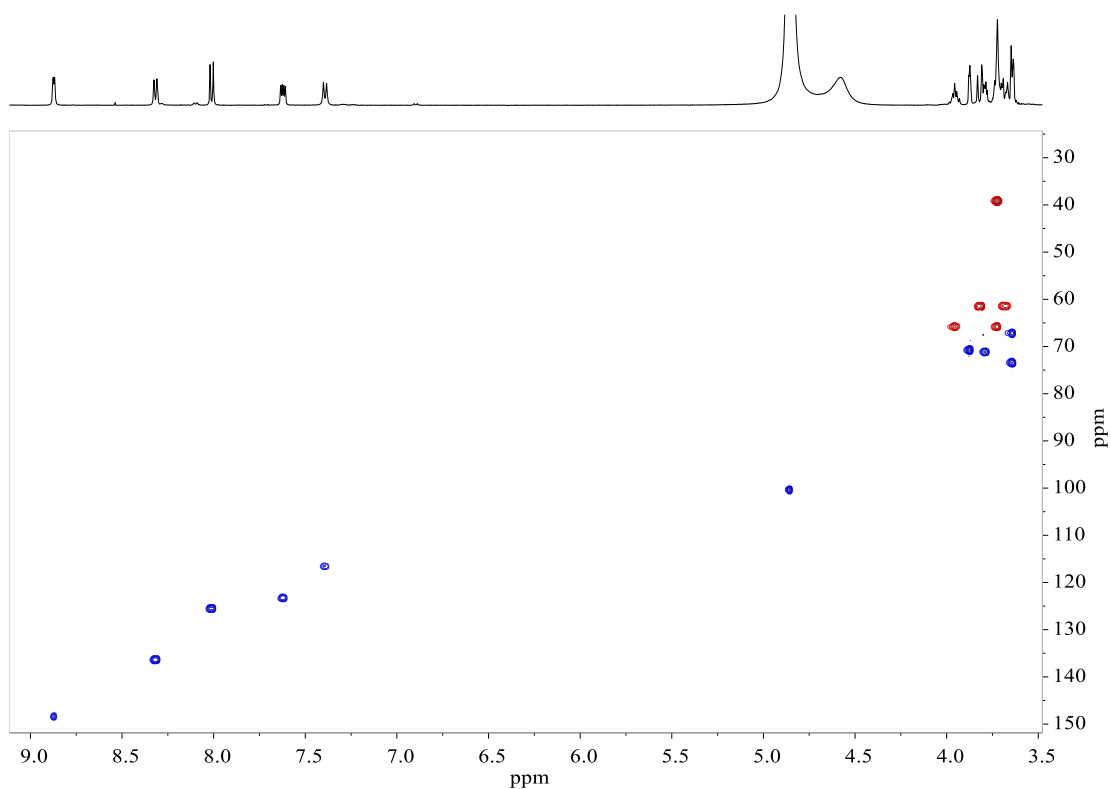

**Figure S13. HSQCAD of ManHQ7 in CD<sub>3</sub>OD at 500 MHz.**

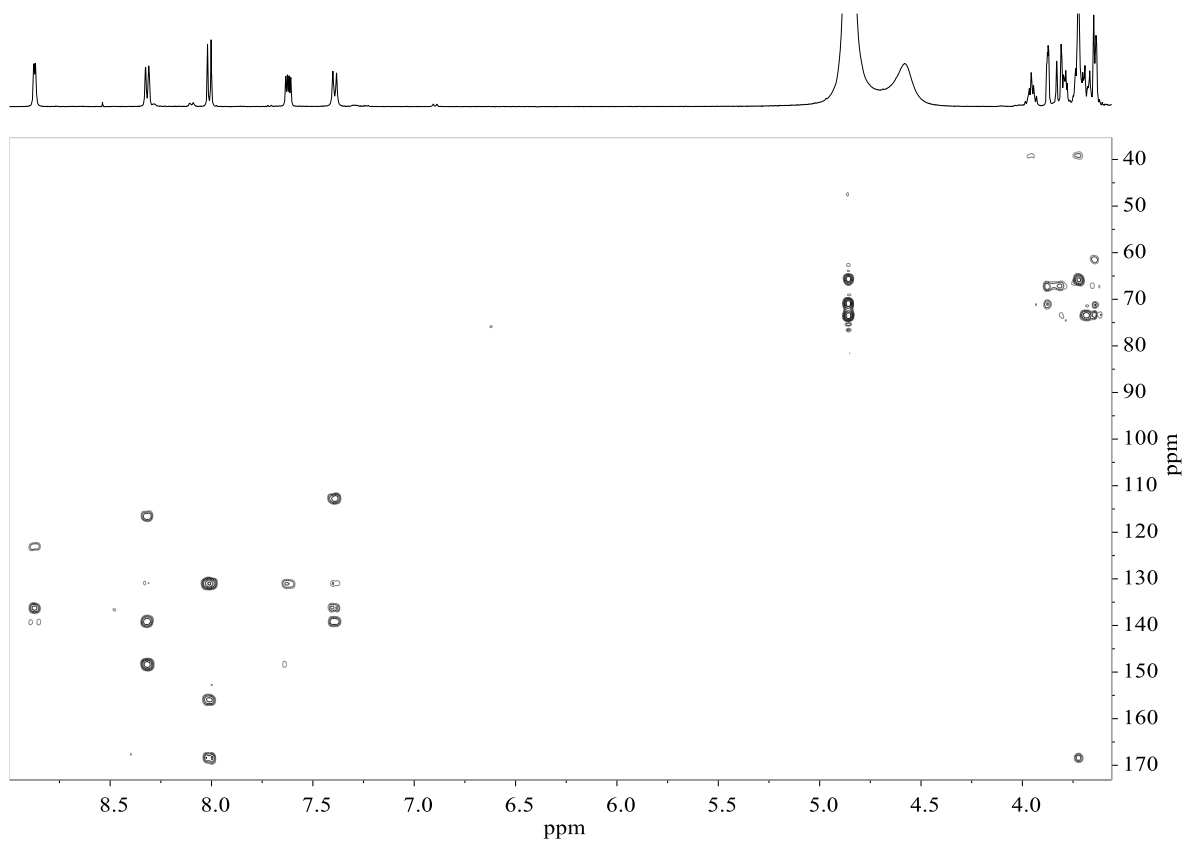

**Figure S14. HMBCAD of ManHQ7 in CD<sub>3</sub>OD at 500 MHz.**

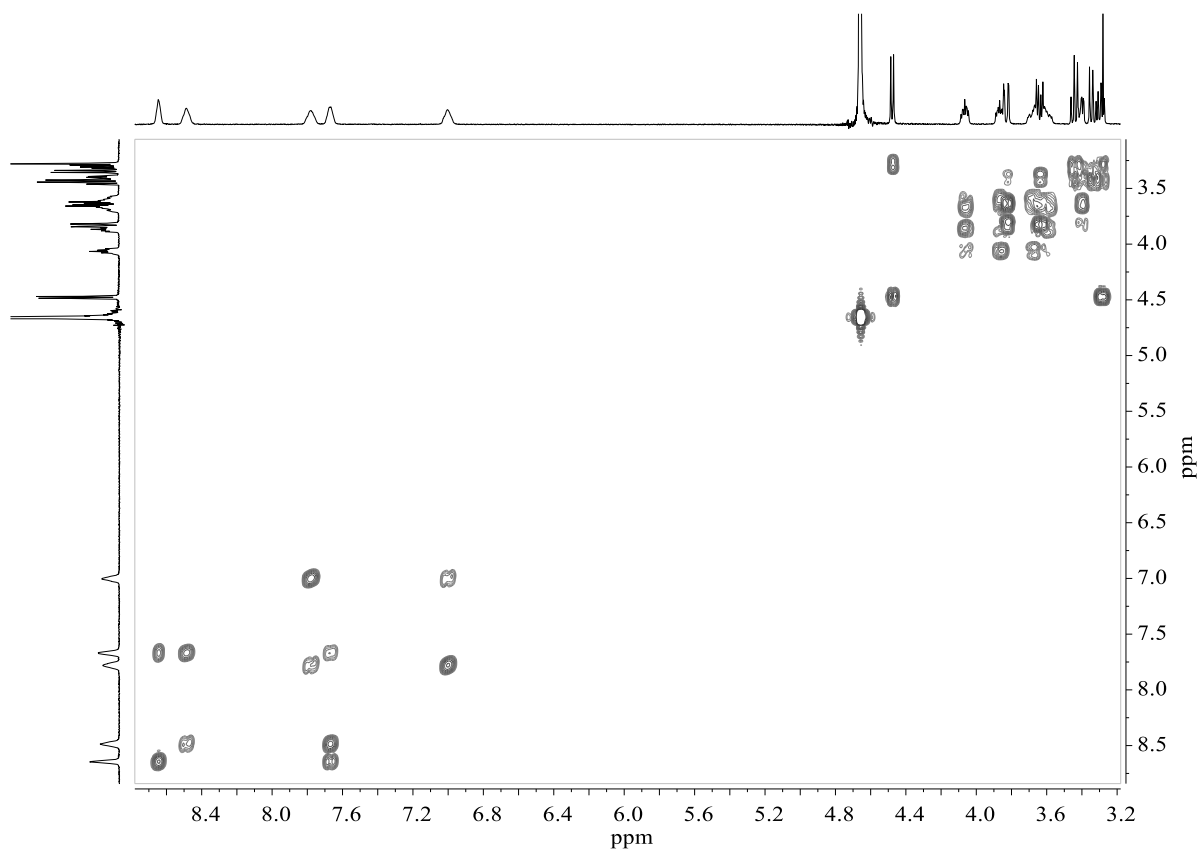

**Figure S15. COSY spectrum of GlcHQ7 in D<sub>2</sub>O at 500 MHz.**

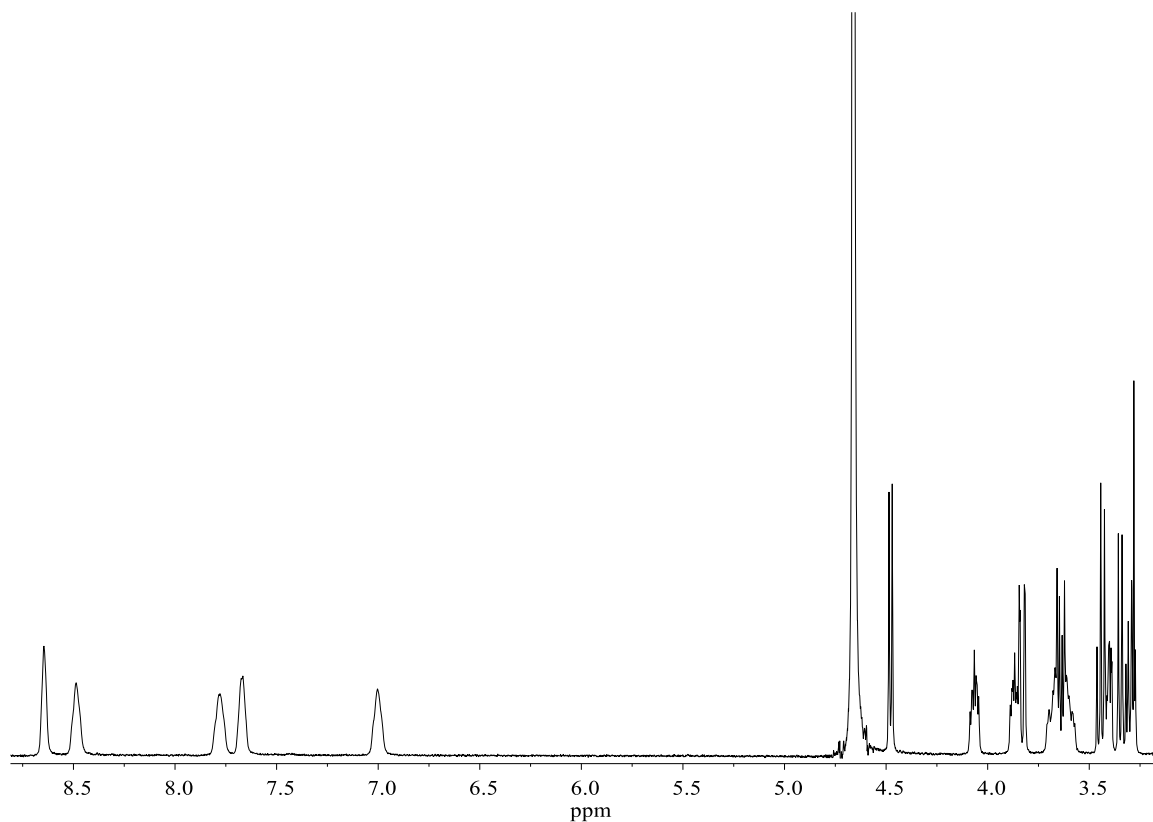

**Figure S16. <sup>1</sup>H NMR spectrum of GlcHQ7 in D<sub>2</sub>O at 500 MHz.**

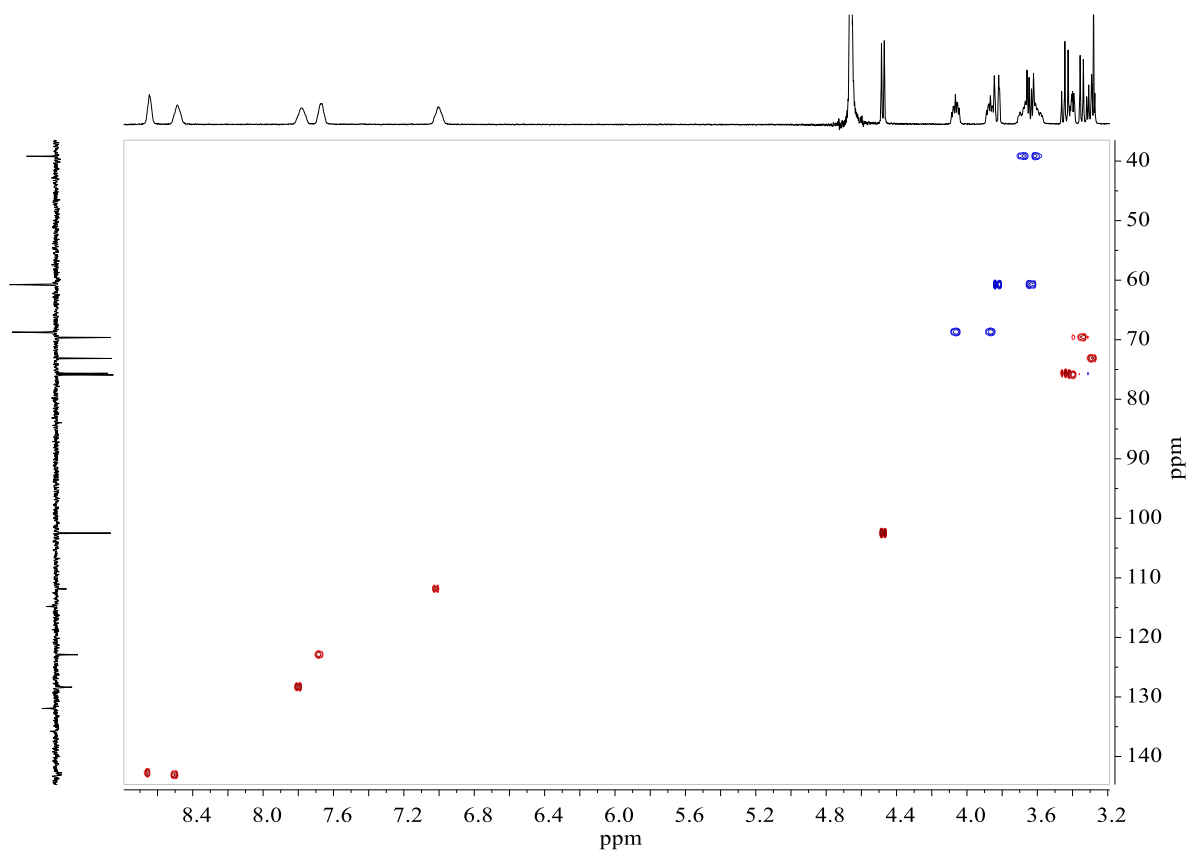

**Figure S17. HSQCAD spectrum of GlcHQ7 in D<sub>2</sub>O at 500 MHz.**

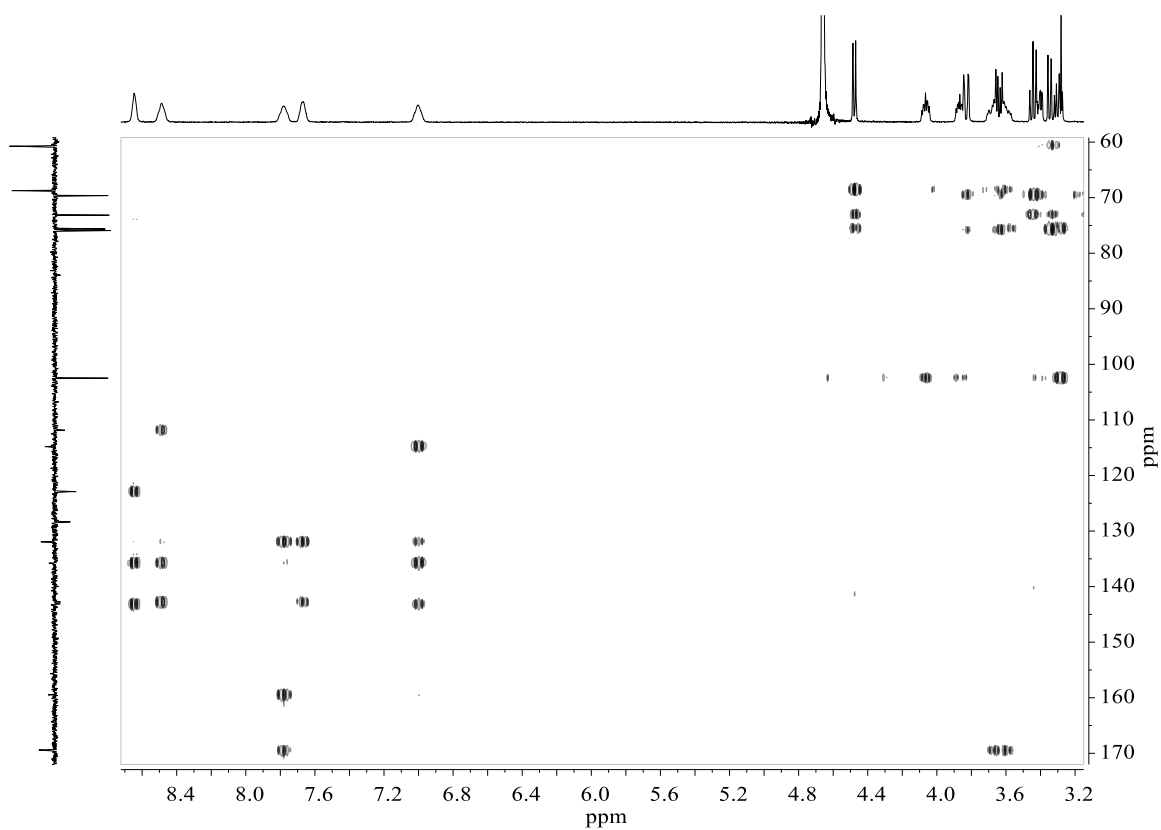

**Figure S18. HMBCAD spectrum of GlcHQ7 in D<sub>2</sub>O at 500 MHz.**

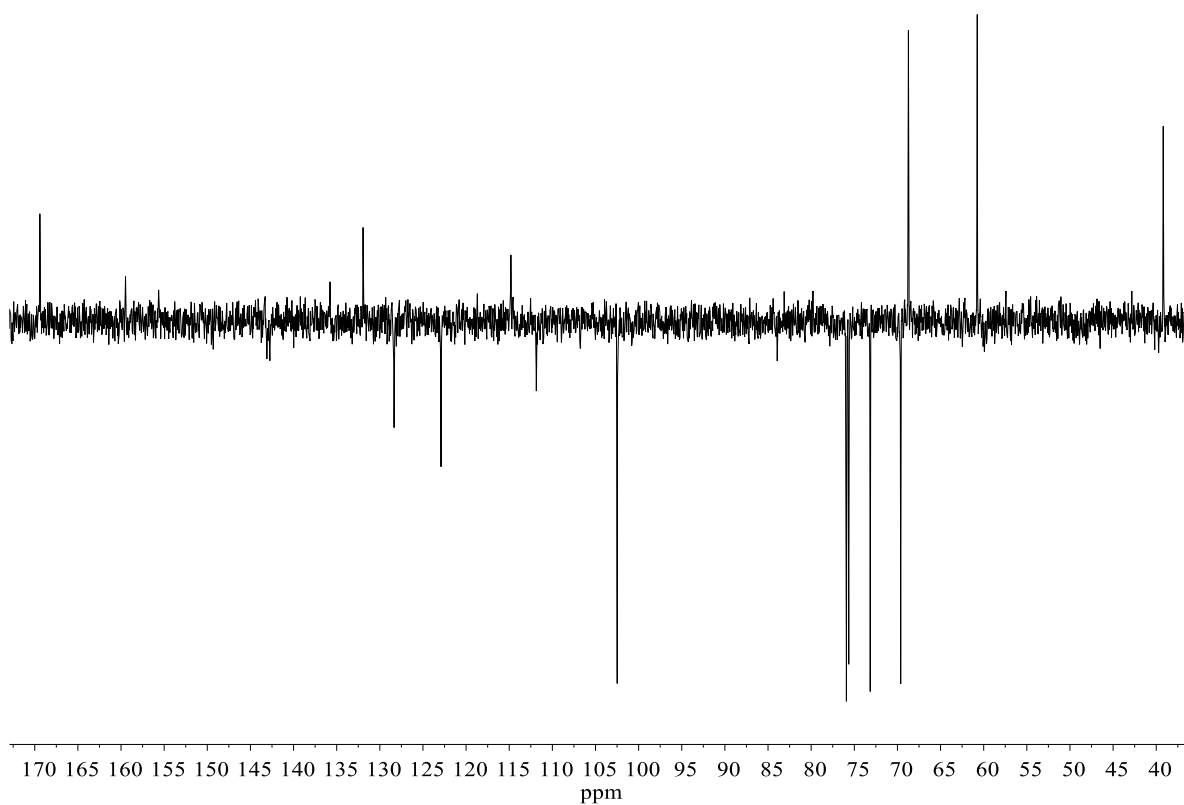

**Figure S19.**  $^{13}\text{C}$  NMR (APT) of GlcHQ7 in  $\text{D}_2\text{O}$  at 125 MHz.

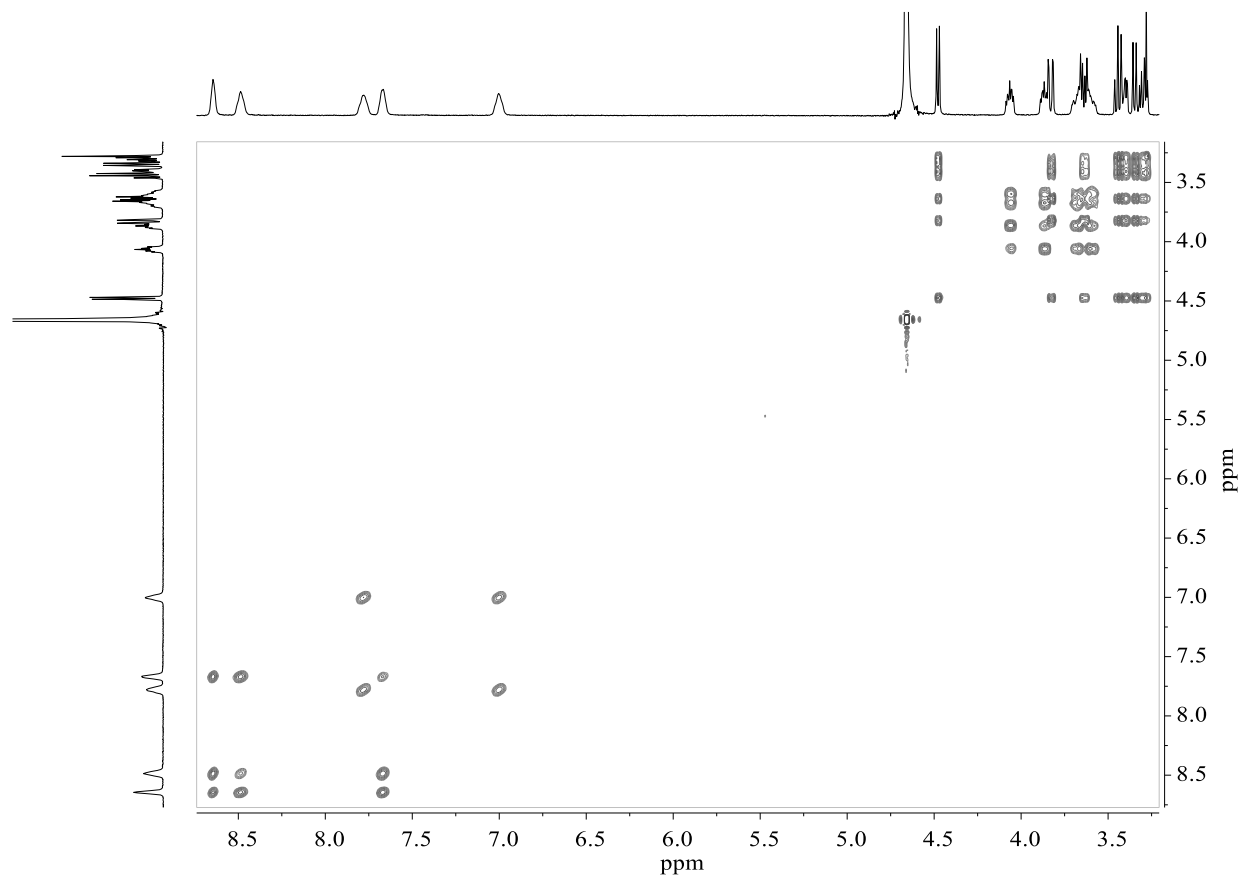

**Figure S20.** TOCSY spectrum of GlcHQ7 in  $\text{D}_2\text{O}$  at 500 MHz.

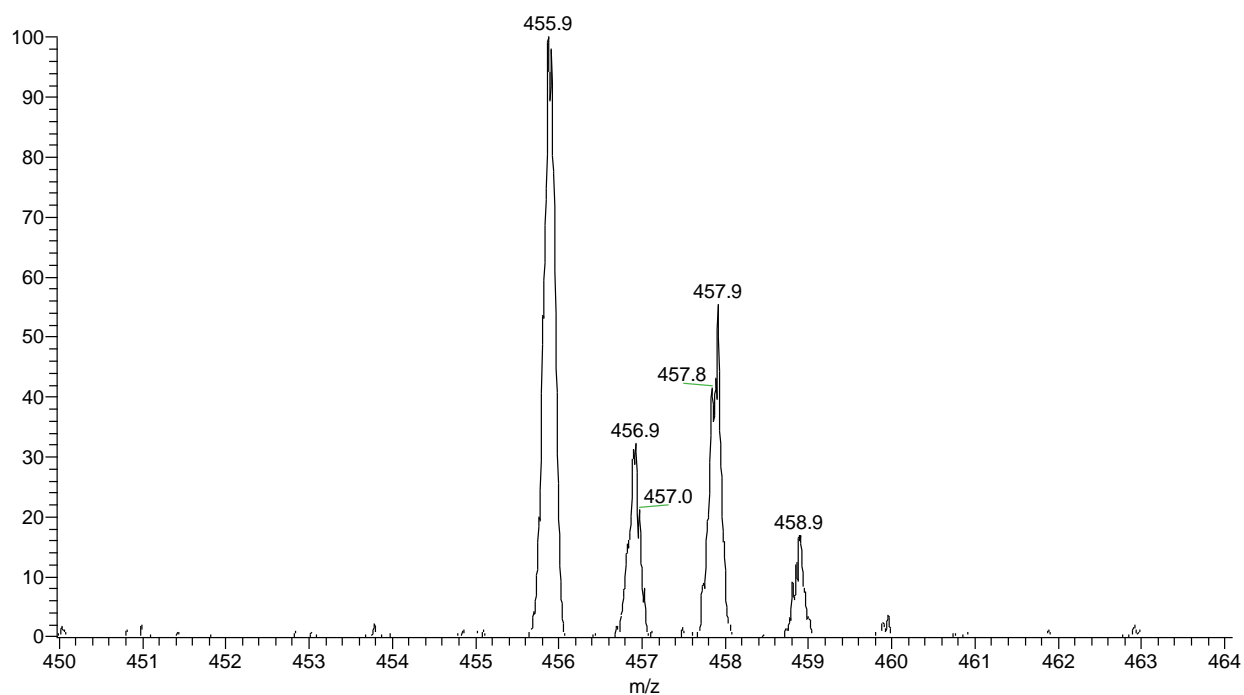

**Figure S21. ESI-MS (zoom-scan) spectrum of the  $[\text{Cu}(\text{ManHQ5})]^+$  species .**

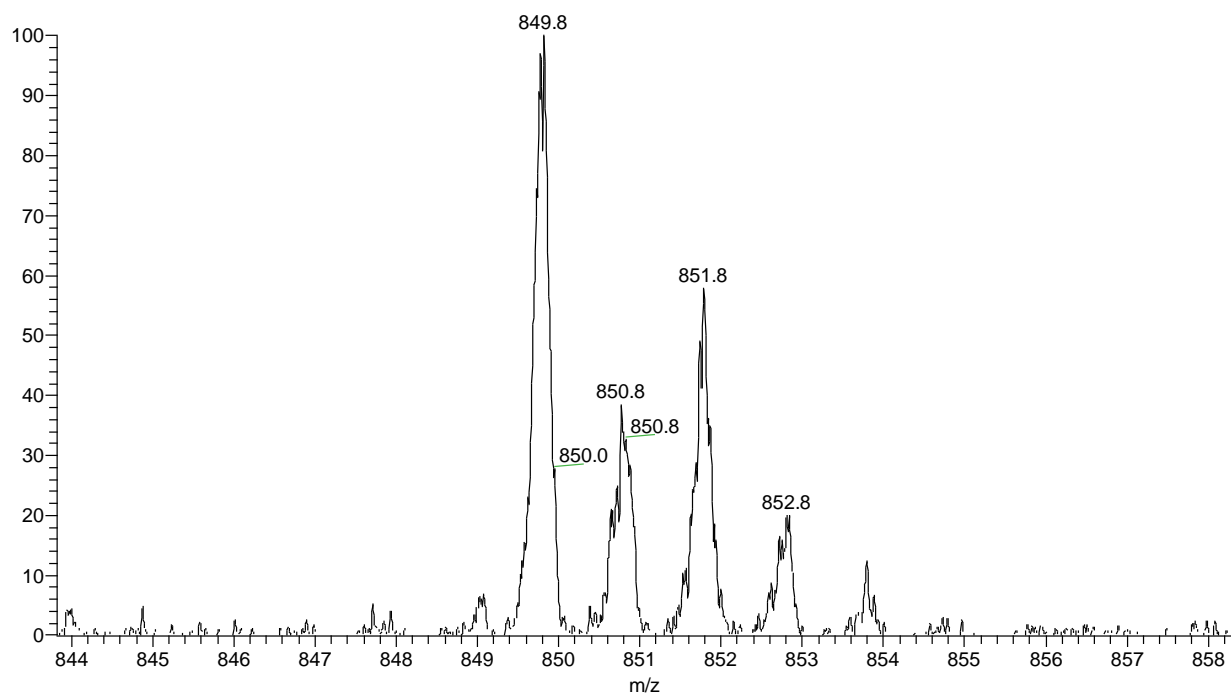

**Figure S22. ESI-MS (zoom-scan) spectrum of the  $[\text{Cu}(\text{ManHQ2})_2+\text{H}]^+$ .**

**Table S1. ESI-MS characterization of the Cu<sup>2+</sup> complexes of the conjugates at pH 7.0. L<sup>-</sup> is a hydroxyquinolate derivative (C<sub>L</sub> = 6.0 × 10<sup>-5</sup> M, M/L= 0.5 ÷ 1).**

| Ligand | Assignment                                       | Calcd ( <i>m/z</i> ) | Found ( <i>m/z</i> ) |
|--------|--------------------------------------------------|----------------------|----------------------|
| ManHQ2 | [LH+H] <sup>+</sup>                              | 395.1                | 395.1                |
|        | [LH+Na] <sup>+</sup>                             | 417.1                | 417.1                |
|        | [CuL] <sup>+</sup>                               | 456.1                | 456.1                |
|        | [CuL <sub>2</sub> +H] <sup>+</sup>               | 850.2                | 849.8                |
|        | [CuL <sub>2</sub> +Na] <sup>+</sup>              | 872.2                | 871.9                |
|        | [Cu <sub>2</sub> L <sub>2</sub> -H] <sup>+</sup> | 911.1                | 910.9                |
| ManHQ5 | [LH+H] <sup>+</sup>                              | 395.1                | 395.2                |
|        | [LH+Na] <sup>+</sup>                             | 417.1                | 417.1                |
|        | [CuL] <sup>+</sup>                               | 456.1                | 455.9                |
|        | [CuL <sub>2</sub> +H] <sup>+</sup>               | 850.2                | 850.1                |
|        | [CuL <sub>2</sub> +Na] <sup>+</sup>              | 872.2                | 872.1                |
| ManHQ7 | [LH+H] <sup>+</sup>                              | 395.1                | 395.1                |
|        | [LH+Na] <sup>+</sup>                             | 417.1                | 417.1                |
|        | [CuL] <sup>+</sup>                               | 456.1                | 456.1                |
|        | [CuL <sub>2</sub> +H] <sup>+</sup>               | 850.2                | 850.0                |
|        | [CuL <sub>2</sub> +Na] <sup>+</sup>              | 872.2                | 872.1                |
|        | [Cu <sub>2</sub> L <sub>2</sub> -H] <sup>+</sup> | 911.1                | 911.0                |
| GlcHQ7 | [LH+H] <sup>+</sup>                              | 395.1                | 395.1                |
|        | [LH+Na] <sup>+</sup>                             | 417.1                | 417.0                |
|        | [CuL] <sup>+</sup>                               | 456.1                | 456.0                |
|        | [CuL <sub>2</sub> +H] <sup>+</sup>               | 850.2                | 850.0                |
|        | [CuL <sub>2</sub> +Na] <sup>+</sup>              | 872.2                | 872.0                |
|        | [Cu <sub>2</sub> L <sub>2</sub> -H] <sup>+</sup> | 911.1                | 911.0                |

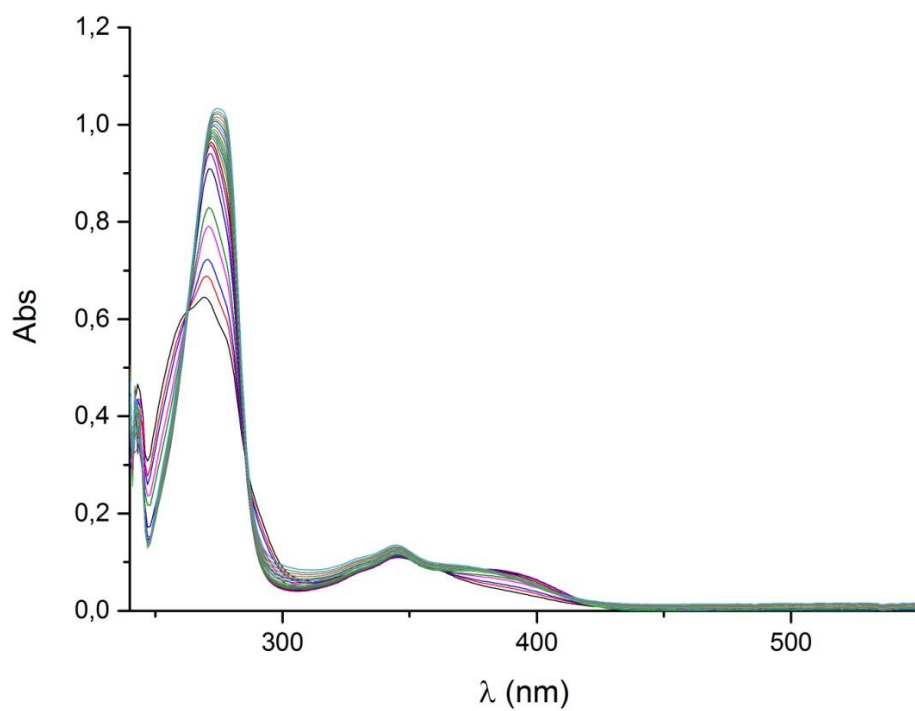

**Figure S23.** UV-vis absorption spectra of ManHQ7 upon the addition of  $\text{Cu}^{2+}$  ions (0–2.0 equivalents).

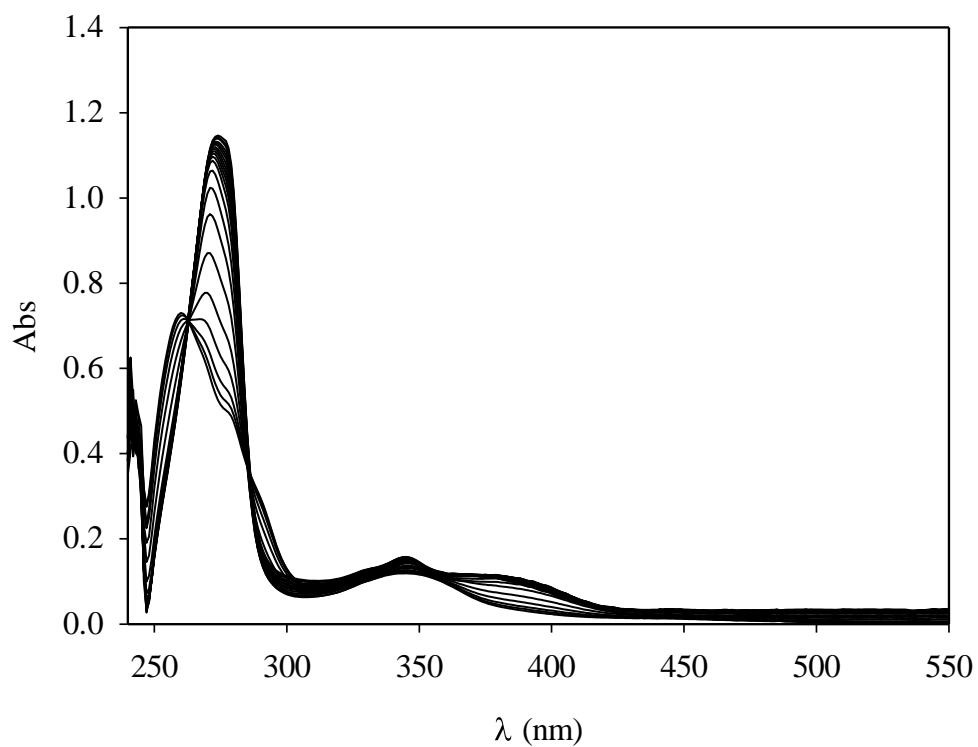

**Figure S24.** UV-vis absorption spectra of GlcHQ7, upon the addition of  $\text{Cu}^{2+}$  ions (0–2.0 equivalents).



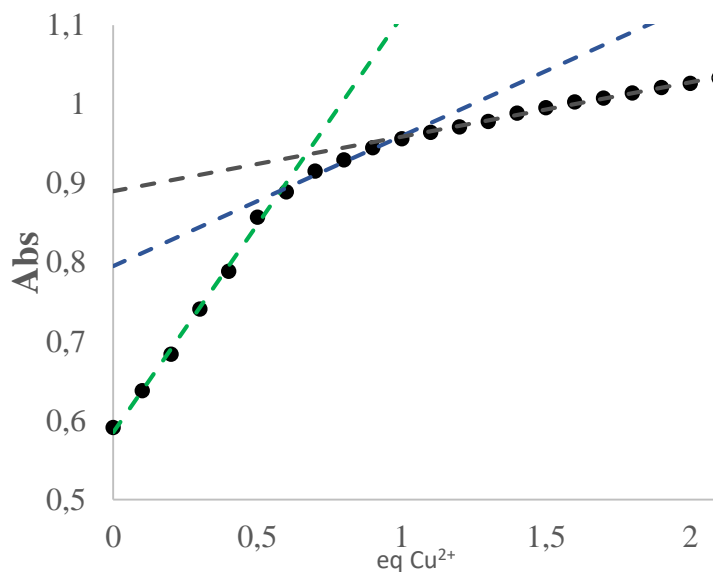

**Figure S25.** The plot of absorbance of ManHQ7 upon addition of  $\text{Cu}^{2+}$  vs the equivalents of titrant added.

**Table S2.** Antiproliferative activity of the HQ glycoconjugates.

| Cell line | ManEtNH2 |                  | ManHQ2 |                  | ManHQ5 |                  | ManHQ7 |                  | GlcHQ7 |                  |
|-----------|----------|------------------|--------|------------------|--------|------------------|--------|------------------|--------|------------------|
|           |          | $\text{Cu}^{2+}$ |        | $\text{Cu}^{2+}$ |        | $\text{Cu}^{2+}$ |        | $\text{Cu}^{2+}$ |        | $\text{Cu}^{2+}$ |
| A2780     | >30      | >30              | >30    | $12.7 \pm 0.3$   | >30    | >30              | >30    | N.D.             | >30    | >30              |
| A549      | >30      | >30              | >30    | >30              | >30    | >30              | >30    | N.D.             | >30    | >30              |
